# Supplementary material for: Bioinformatic analysis reveals the importance of epithelial-mesenchymal transition in the development of endometriosis
Source: PubMed Central journal article supplement (PMC7242372; doi:10.1038/s41598-020-65606-9), 2020-05-21
Supplement: 41598_2020_65606_MOESM1_ESM.pdf [file 41598_2020_65606_MOESM1_ESM.pdf]

**Bioinformatic analysis reveals the importance of epithelial-mesenchymal  
transition in the development of endometriosis**

Meihong Chen<sup>1,\*</sup>, Yilu Zhou<sup>2,3,\*</sup>, Hong Xu<sup>4</sup>, Charlotte Hill<sup>2</sup>, Rob M. Ewing<sup>2,3</sup>,  
Deming He<sup>1</sup>, Xiaoling Zhang<sup>1,#</sup>, Yihua Wang<sup>2,3,5,#</sup>

<sup>1</sup>Department of Gynecology, Jiangxi Maternal and Child Health Hospital, Nanchang, Jiangxi, China. <sup>2</sup>Biological Sciences, Faculty of Environmental and Life Sciences, University of Southampton, Southampton, SO17 1BJ, UK. <sup>3</sup>Institute for Life Sciences, University of Southampton, Southampton, SO17 1BJ, UK. <sup>4</sup>Department of Medicine, Nanchang University, Nanchang, Jiangxi, China. <sup>5</sup>NIHR Southampton Biomedical Research Centre, University Hospital Southampton, Southampton, SO16 6YD, UK.

\*These authors contributed equally to this work.

#Correspondence should be addressed to X.Z. (e-mail: [xlzzz777@126.com](mailto:xlzzz777@126.com)) or Y.W. (e-mail: [yihua.wang@soton.ac.uk](mailto:yihua.wang@soton.ac.uk)).

---

## **Supplementary Figure Legends**

### **Supplementary Figure 1. Standardisation of gene expression in GSE7305 dataset.**

Graphs showing the data before (left) and after (right) normalisation.

### **Supplementary Figure 2. Standardisation of gene expression in GSE11691**

**dataset.** Graphs showing the data before (left) and after (right) normalisation.

### **Supplementary Figure 3. Standardisation of gene expression in GSE12768**

**dataset.** Graphs showing the data before (left) and after (right) normalisation.

expression value

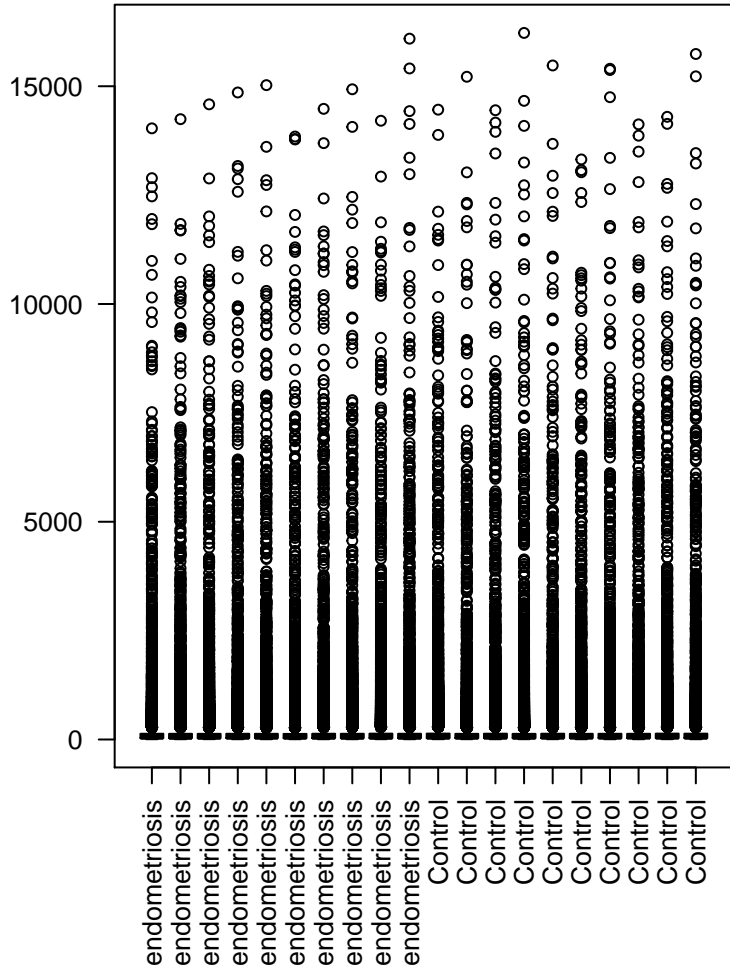

expression value

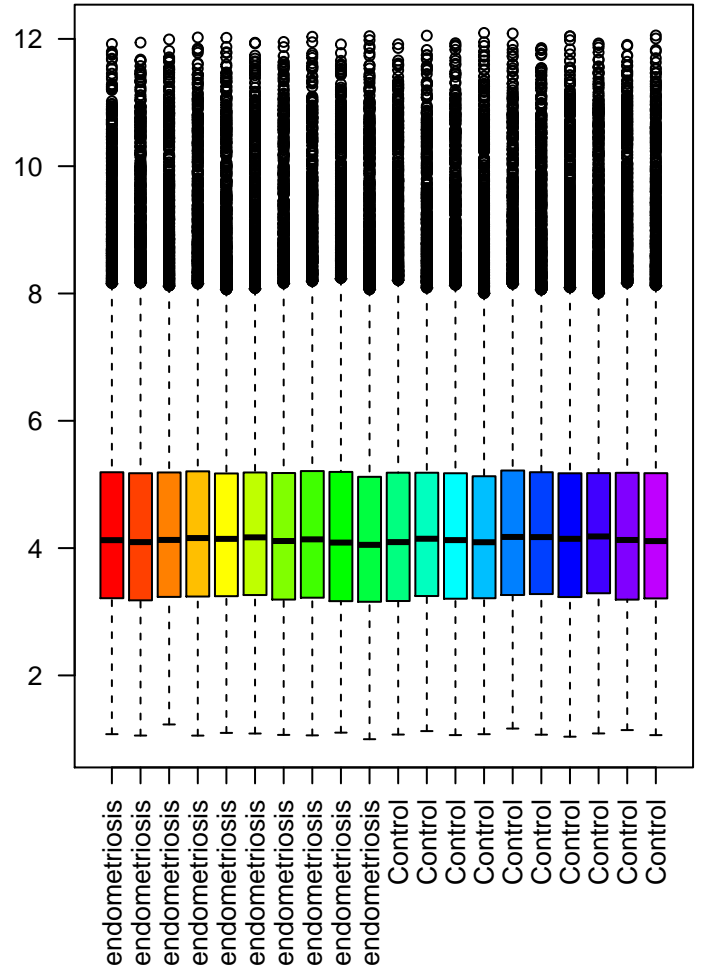

Supplementary Figure 1. Standardisation of gene expression in GSE7305 dataset.

expression value

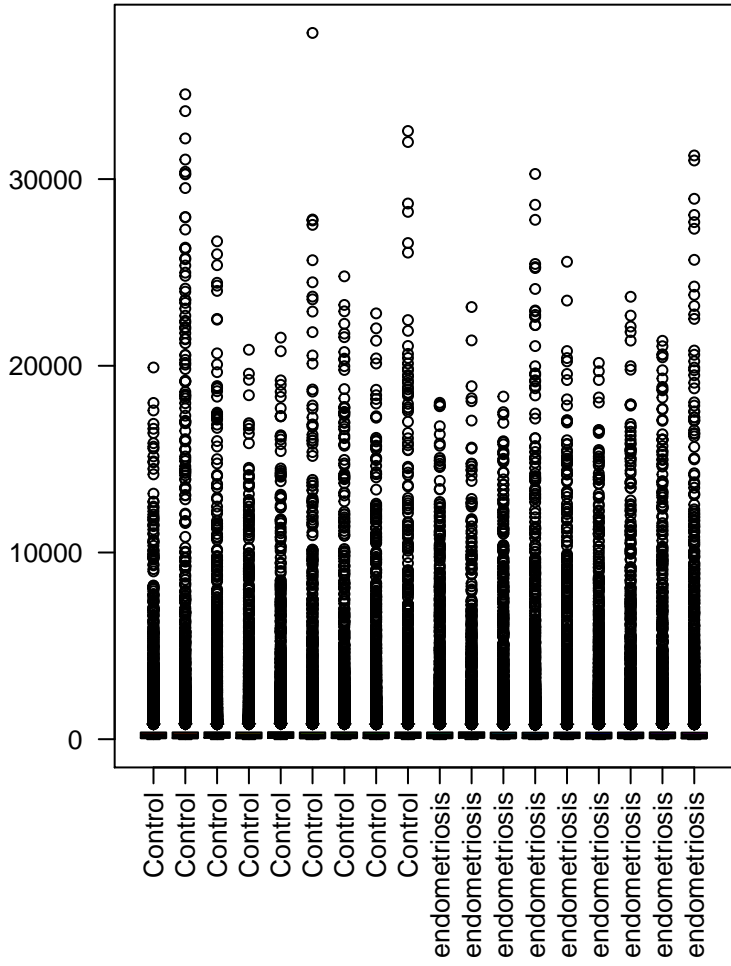

expression value

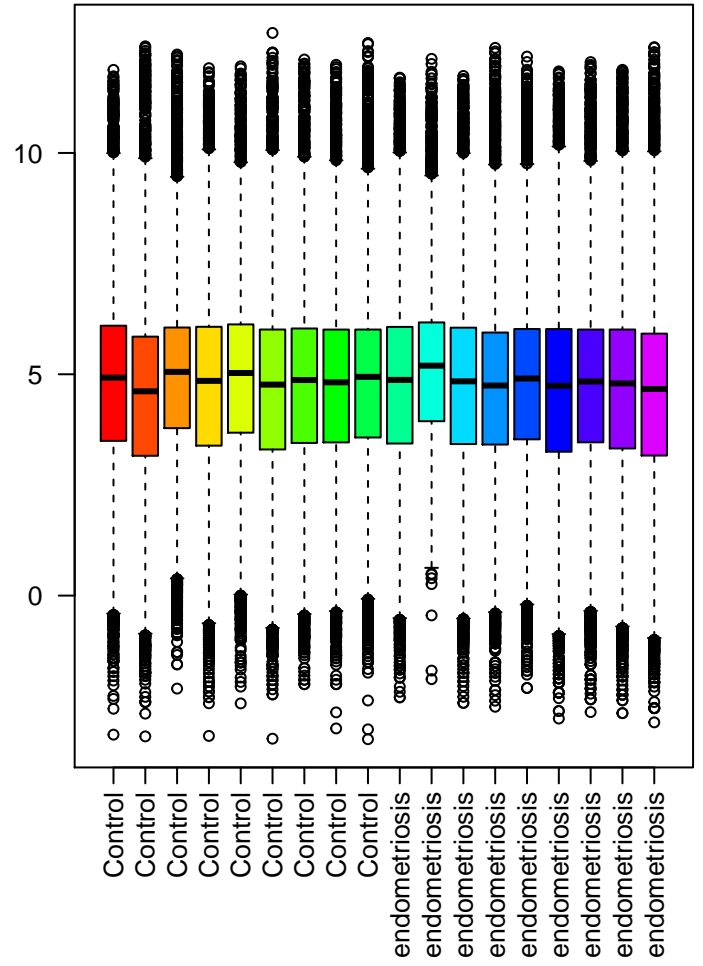

Supplementary Figure 2. Standardisation of gene expression in GSE11691 dataset.

expression value

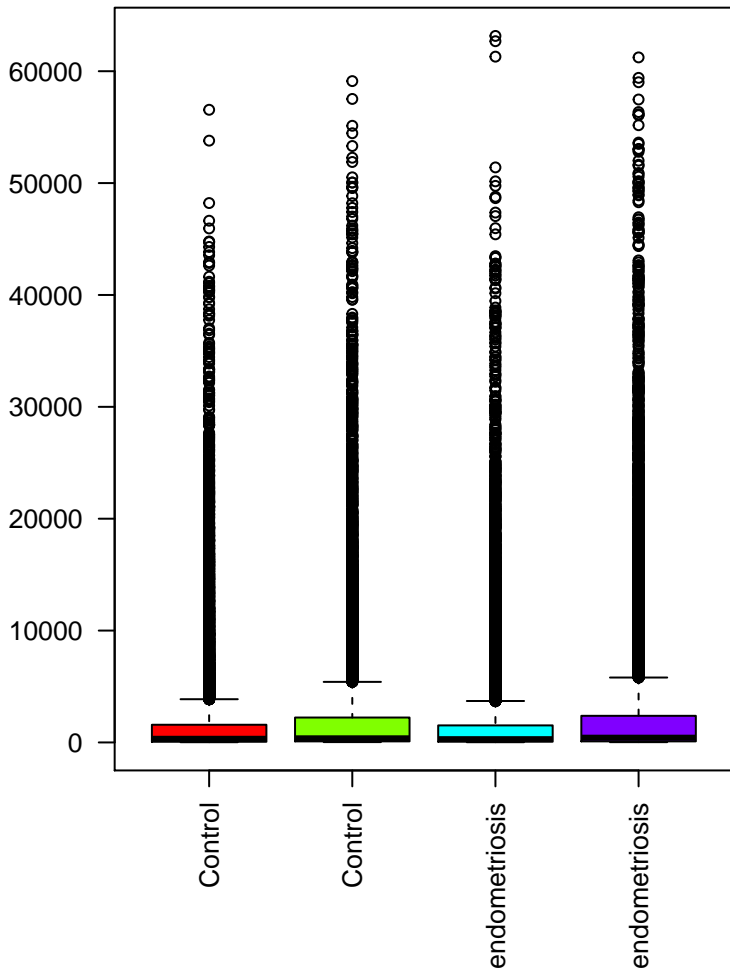

expression value

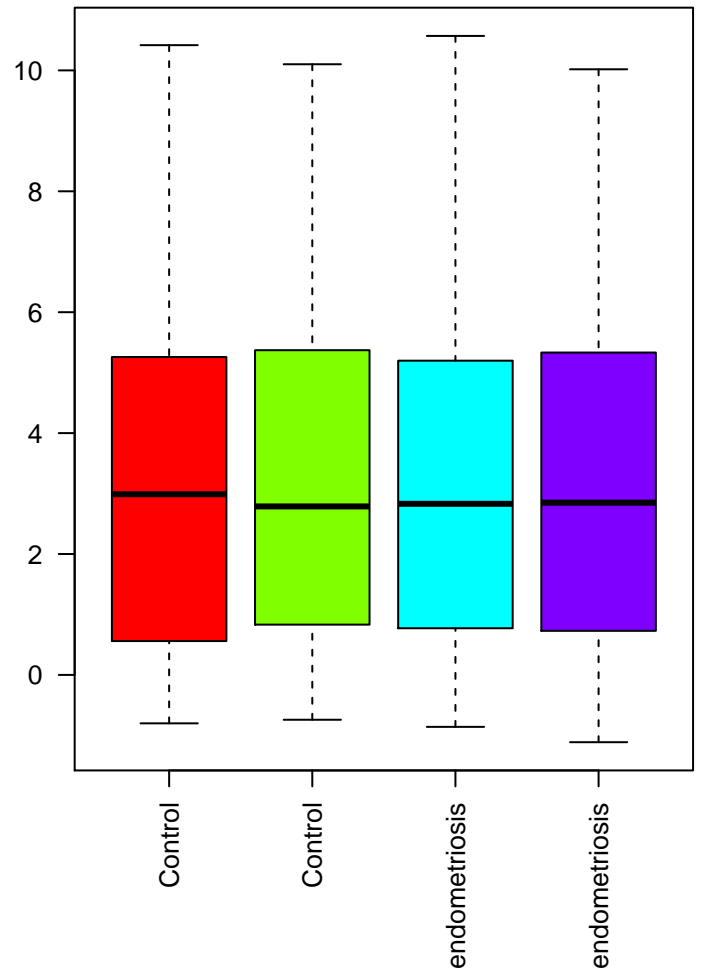

Supplementary Figure 3. Standardisation of gene expression in GSE12768 dataset.
